# Supplementary material for: Deciphering the molecular basis of invasiveness in Sdhb-deficient cells
Source: PubMed Central journal article supplement (PMC4741742; doi:10.18632/oncotarget.5106), 2015-10-08
Supplement: oncotarget-06-32955-s001.pdf [file oncotarget-06-32955-s001.pdf]

## SUPPLEMENTARY FIGURES AND VIDEOS

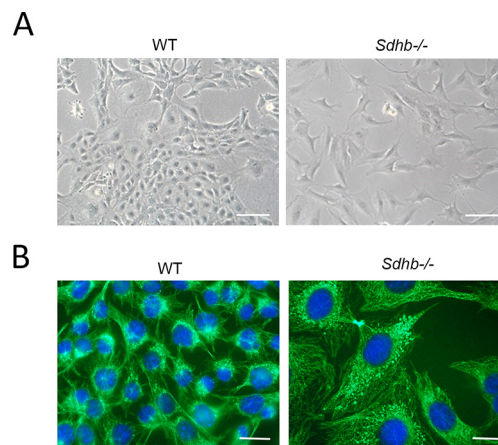

**Supplementary Figure S1: Morphological characterization of *Sdhb*<sup>-/-</sup> imCC.** **A.** Cell morphology observation by white light microscopy. Scale bar 125  $\mu$ m. **B.** Cell morphology observed by  $\beta$ -tubulin staining using immunofluorescence. Scale bar 20  $\mu$ m.

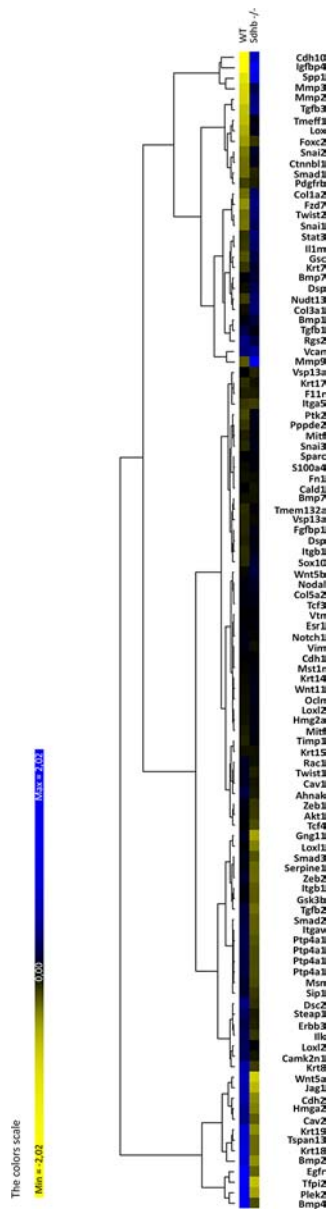

Supplementary Figure S2: Related to Figure 2: Complete heat map of EMT-associated transcriptome data in WT and Sdhb<sup>-/-</sup> imCC.

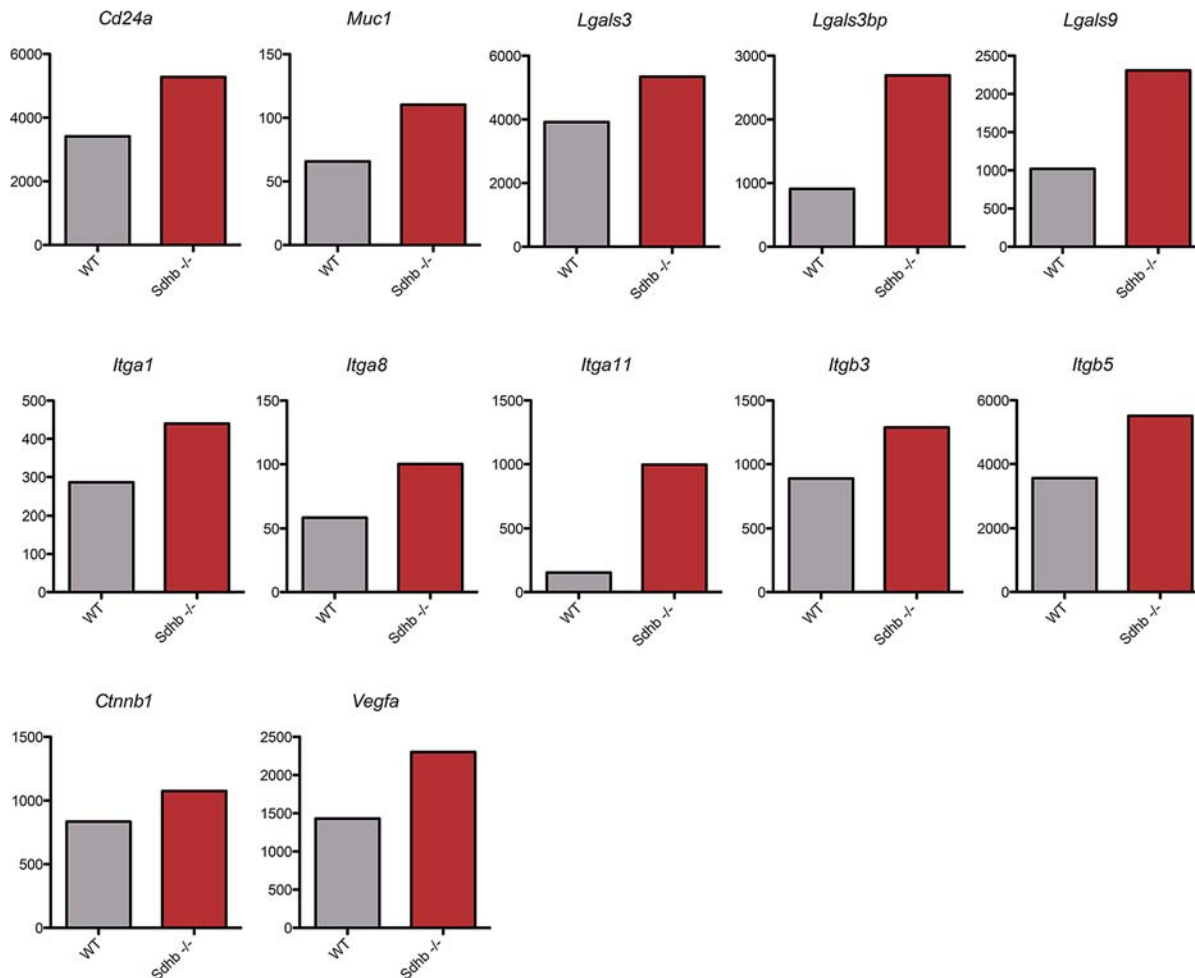

Supplementary Figure S3: Related to Figure 2: Transcriptomic data correlated with high adhesive skills observed in Sdhb<sup>-/-</sup> cells compared to WT cells.

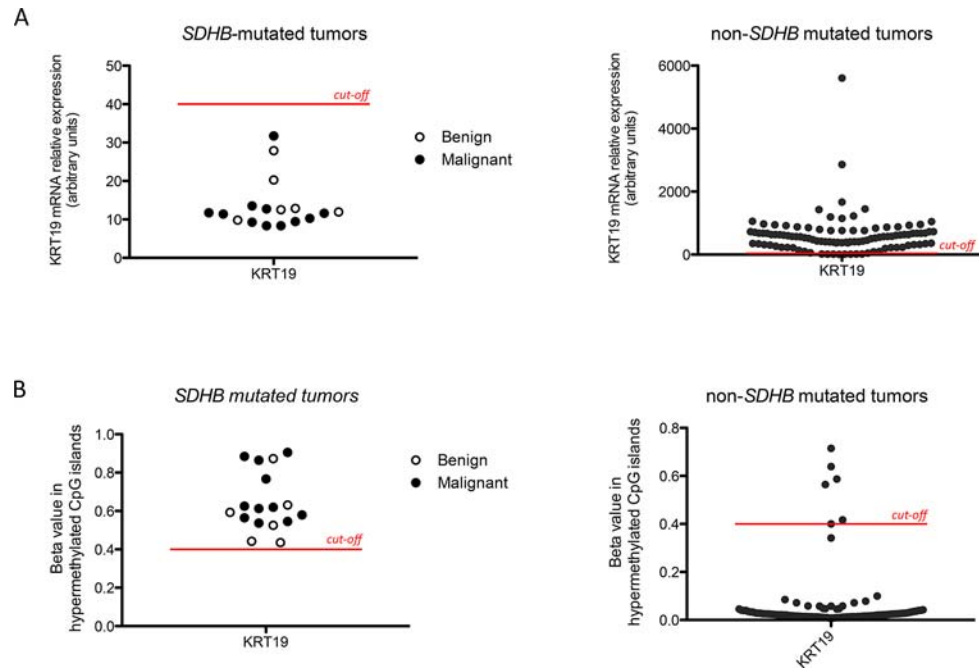

**Supplementary Figure S4: Related to Figure 3: The choice of KRT19 as the best gene candidate.** Cut-off allowing separating *SDHB*-mutated tumors from all others, based on KRT19 mRNA level of expression and promoter methylation. **A.** All *SDHB*-mutated tumors had a KRT19 expression level inferior to the defined cut-off, while non-*SDHB* mutated tumors had expression levels equivalent or superior to the cut-off. **B.** All *SDHB*-mutated tumors had a KRT19 promoter methylation mean level superior to the defined cut-off, while all but 6 non-*SDHB* mutated tumors had KRT19 promoter methylation mean level inferior to the cut-off. Each dot represents a tumor sample and its relative level of KRT19 mRNA expression or KRT19 promoter methylation.

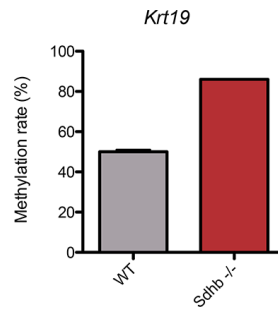

**Supplementary Figure S5: Related to Figure 3: Krt19 promoter methylation in mouse chromaffin cells.** Differential methylation rate of Krt19 promoter in Sdhb deficient cells compared to WT cells. Representation of imCC methylome data obtained using RRBS technique.

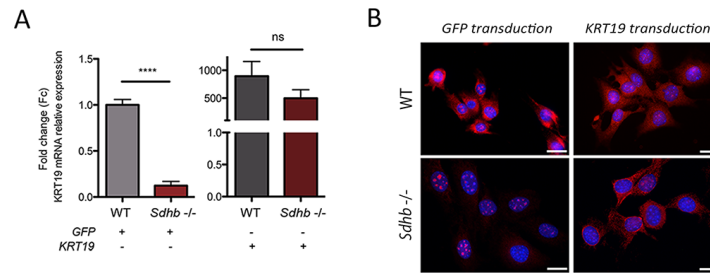

**Supplementary Figure S6: Related to Figure 4: KRT19 efficient rescue in *Sdhb*<sup>-/-</sup> imCC.** **A.** KRT19 transduction validation was performed at mRNA level using qRT-PCR. Cells were independently transduced with the same lentiviral particles encoding GFP, as a control. \*\*\*\* $p < 0.0001$ ; ns, non-significant. Data are shown as fold change relative to GFP-transduced WT cells **B.** KRT19 rescue was confirmed in *Sdhb*<sup>-/-</sup> imCC at protein level using immunofluorescence. As a control cells were independently transduced with the same lentiviral particles encoding GFP. Scale bar 20  $\mu\text{m}$ .

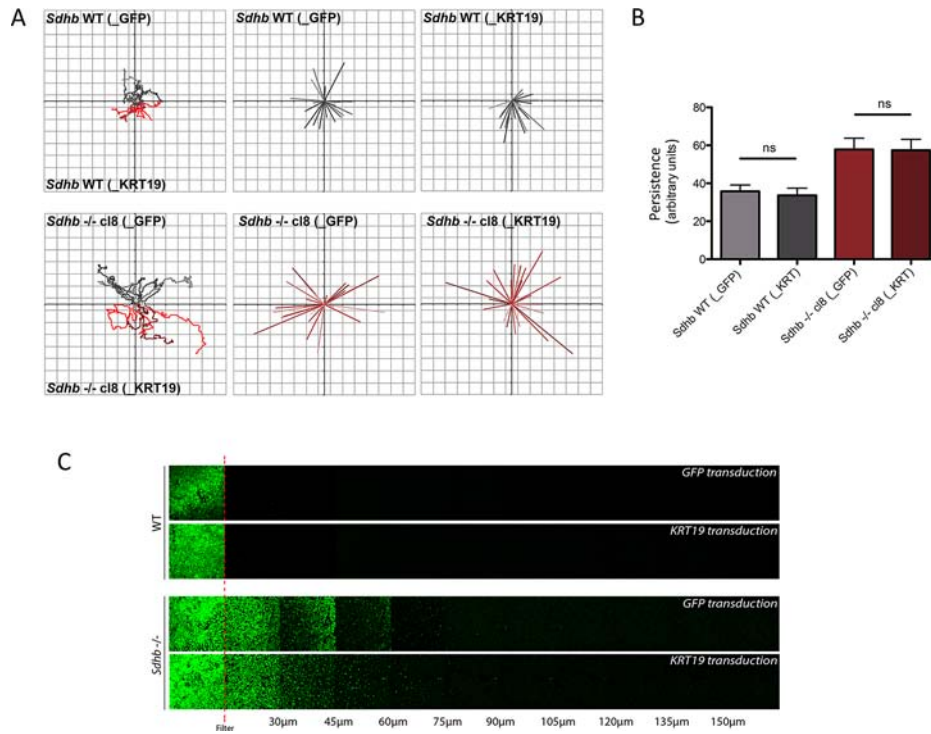

**Supplementary Figure S7: Related to Figure 4: Persistence and invasion evaluation after KRT19 rescue.** **A.** Vector diagrams representing total distance (left panels), and displacement (middle and right panels) of WT and *Sdhb*<sup>-/-</sup> imCC with or without KRT19 rescue **B.** Comparison of displacements after KRT19 rescue. Data are represented as mean ± SEM. ns, non-significant **C.** Involvement of KRT19 in cell invasion was assessed through inverted invasion assay in a Matrigel matrix. Red line symbolized the filter.

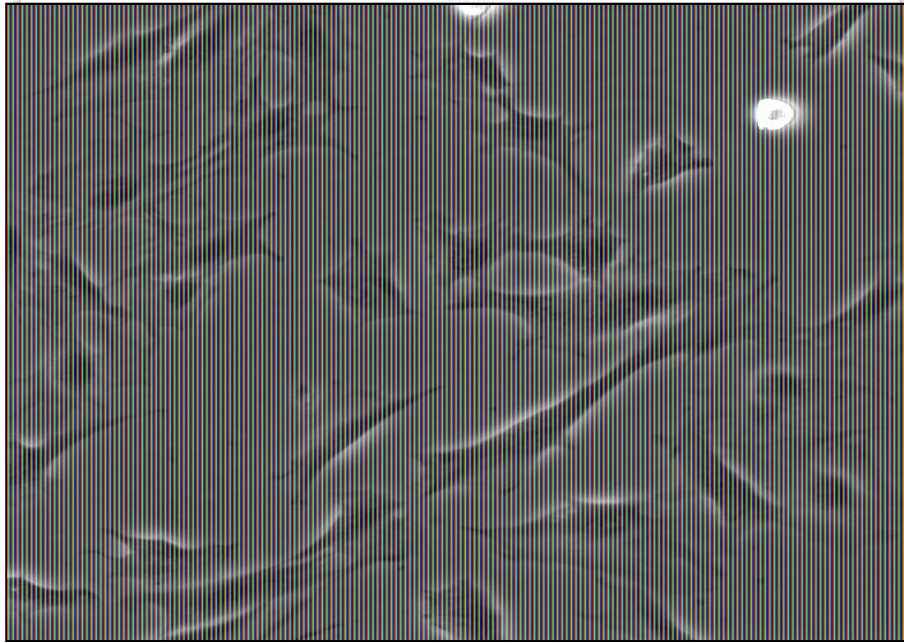

**Supplementary Movie S1: Related to Figure 1: Representative video of WT cells followed during 12 hours.** It allowed determination of cells speed and directionality.



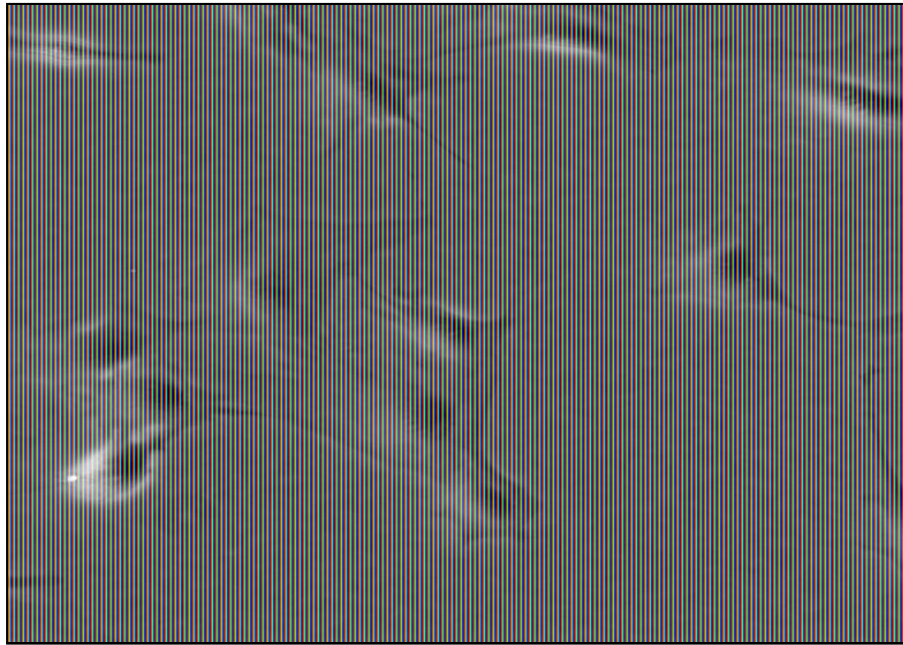

**Supplementary Movie S2: Related to Figure 1: Representative video of Sdhb<sup>-/-</sup> cells followed during 12 hours. It allowed determination of cells speed and directionality.**
